# Supplementary material for: Association between Serum Metal Levels and Blood Pressure in Aluminium Smelting Workers: Mediating Role of Gamma-Glutamyltransferase
Source: Research Square preprint supplement (doi:10.21203/rs.3.rs-8071936/v1), 2025-11-24
Supplement: Supplementary file 1 [file 048f68410ab52d96f1893ad2.docx]

**Supporting information**

**Association between Serum Metal Levels and Blood Pressure in Aluminium Smelting Workers: Mediating Role of Gamma-Glutamyltransferase**

**Table of contents**

**Table S1** Posterior inclusion probabilities (PIPs) of BKMR model

**Table S2** Correlation between 17 Metal Concentrations and GGT

**Fig. S1** Spearman correlation matrix between metals.

**Fig. S2** Variable selection paths and optimal regularisation parameter selection in LASSO regression analysisn.

**Fig. S3** Univariate exposure–response functions for Cu, Mo and Sr in relation to blood pressure.

**Fig. S4** Interactions between single metals and mixed metal exposures.

**Fig. S5** RCS dose–response relationships between Cu and Mo exposure levels and SBP/DBP.

**Table S1**

### Posterior inclusion probabilities (PIPs) of BKMR model

| Metals PIPs | SBP | DBP |
| --- | --- | --- |
| Cu | 0.390 | 0.040 |
| Mo | 0.221 | 0.365 |
| Sr | 0.131 | 0.180 |

### **Table S2** Correlation between 17 Metal Concentrations and GGT

| Metals | GGT | |
| --- | --- | --- |
| β（95% CI） | *P value* |
| Cu | **0.59 (0.31, 0.87)** | **<0.001** |
| Mo | **-0.21 (-0.34, -0.08)** | **0.002** |
| Sr | 0.15 (-0.04, 0.35) | 0.129 |
| Na | -0.47 (-1.01, 0.08) | 0.093 |
| Fe | -0.03 (-0.17, 0.11) | 0.671 |
| Zn | -0.36 (-0.73, 0.00) | 0.051 |
| Se | 0.00 (-0.36, 0.36) | 0.998 |
| V | -0.24 (-0.53, 0.05) | 0.103 |
| Cr | 0.64 (-0.04, 1.33) | 0.064 |
| Co | **-0.08 (-0.13, -0.02)** | **0.010** |
| Al | -0.01 (-0.04, 0.01) | 0.205 |
| Ti | **0.75 (0.37, 1.13)** | **<0.001** |
| As | 0.02 (-0.06, 0.09) | 0.669 |
| Sb | -0.01 (-0.05, 0.04) | 0.749 |
| Ba | -0.04 (-0.22, 0.14) | 0.670 |
| Hg | **0.12 (0.02, 0.23)** | **0.026** |
| Tl | -0.14 (-0.31, 0.03) | 0.095 |

Note: The models were adjusted for age, BMI, marital status, ethnicity, education level, income, smoking and drinking. All metal and GGT concentrations were log₁₀-transformed prior to analysis.

|  |
| --- |

**Fig. S1.** Spearman correlation matrix between metals.Values represent correlation coefficients. Magnitude and direction of circle and colour response correlation coefficients.
Na, Sodium; Fe, Iron; Zn, Zinc; Cu, Copper; Se, Selenium; V, Vanadium; Cr, Chromium; Co, Cobalt; Mo, Molybdenum; Al, Aluminum; Ti, Titanium; As, Arsenic; Sr, Strontium; Sb, Antimony; Ba, Barium; Hg, Mercury; Tl, Thallium. Values represent correlation coefficients. Magnitude and direction of circle and colour response correlation coefficients.

| 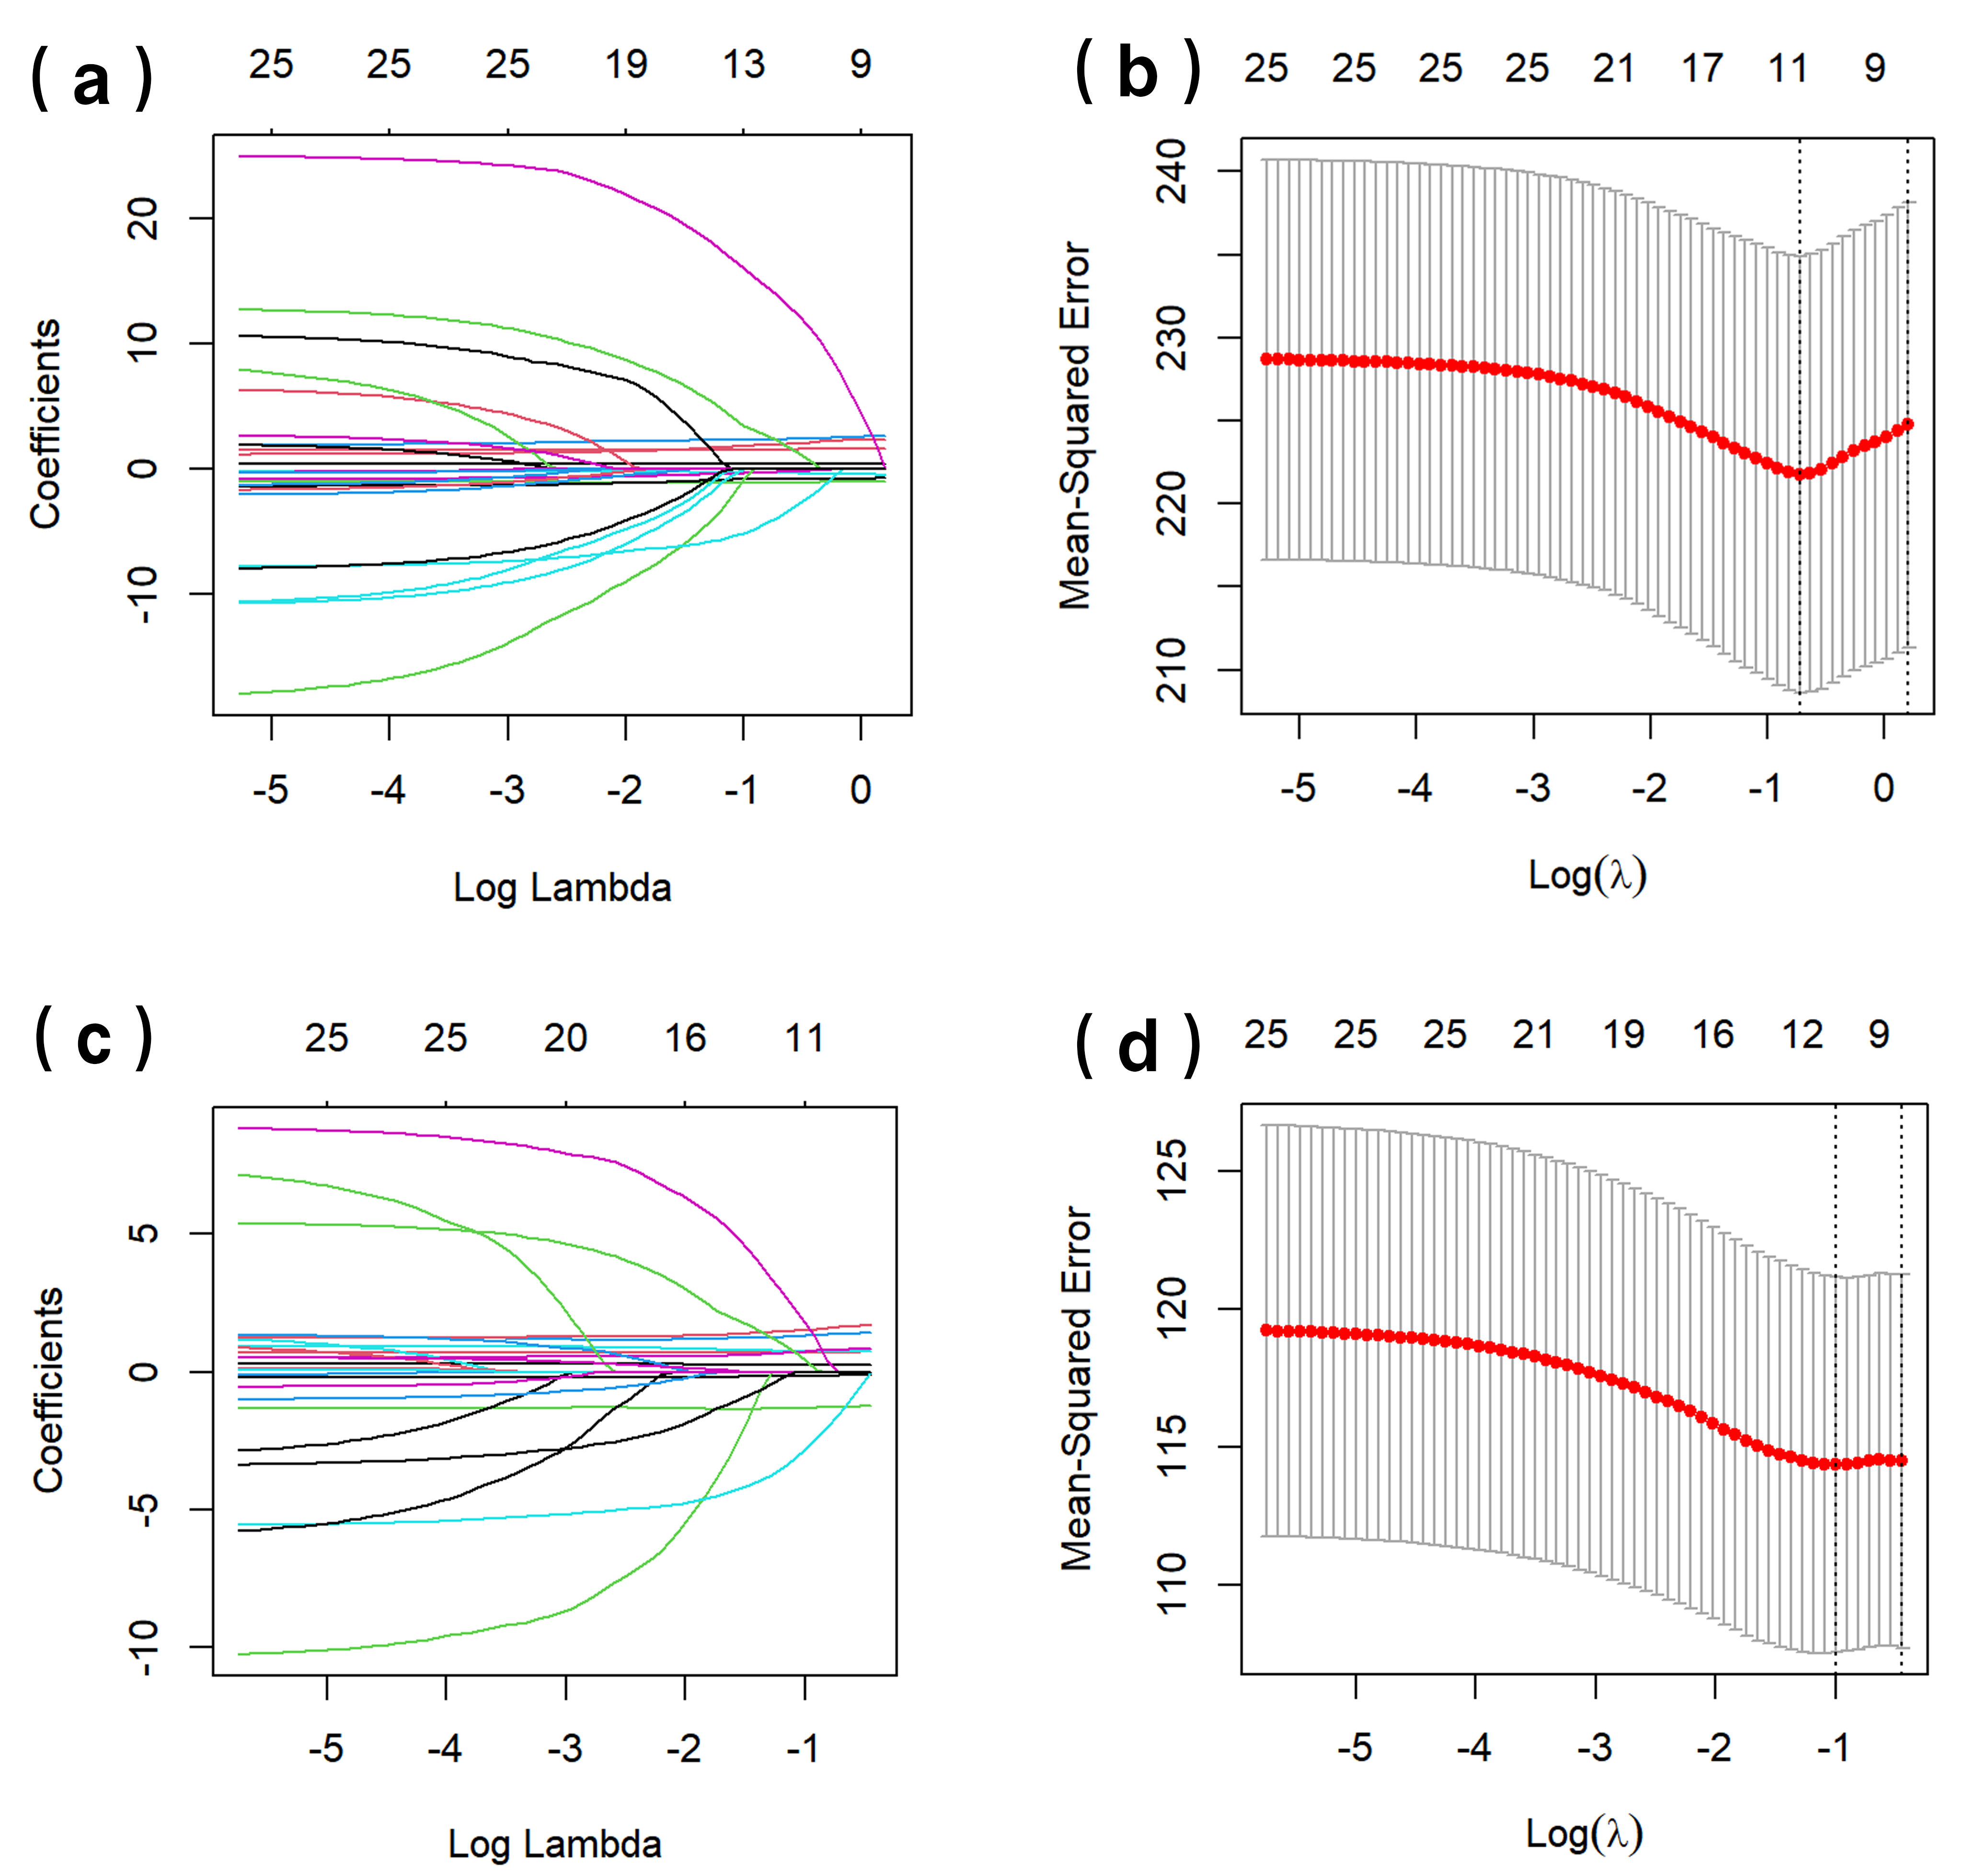 |
| --- |

**Fig. S2.** Variable selection paths and optimal regularisation parameter selection in LASSO regression analysis. Panels (a) and (c) show the coefficient path plots, illustrating how variable coefficients changed with increasing regularisation parameter (λ). Panels (b) and (d) present the cross-validation curves for selecting the optimal λ, where the x-axis represents log(λ) and the y-axis indicates the mean square error (MSE). In the SBP model (a–b), the optimal λ (lambda.min) was 0.486, while in the DBP model (c–d), the optimal λ was 0.404. All models were adjusted for age, BMI, marital status, ethnicity, education level, income, smoking and drinking.

| 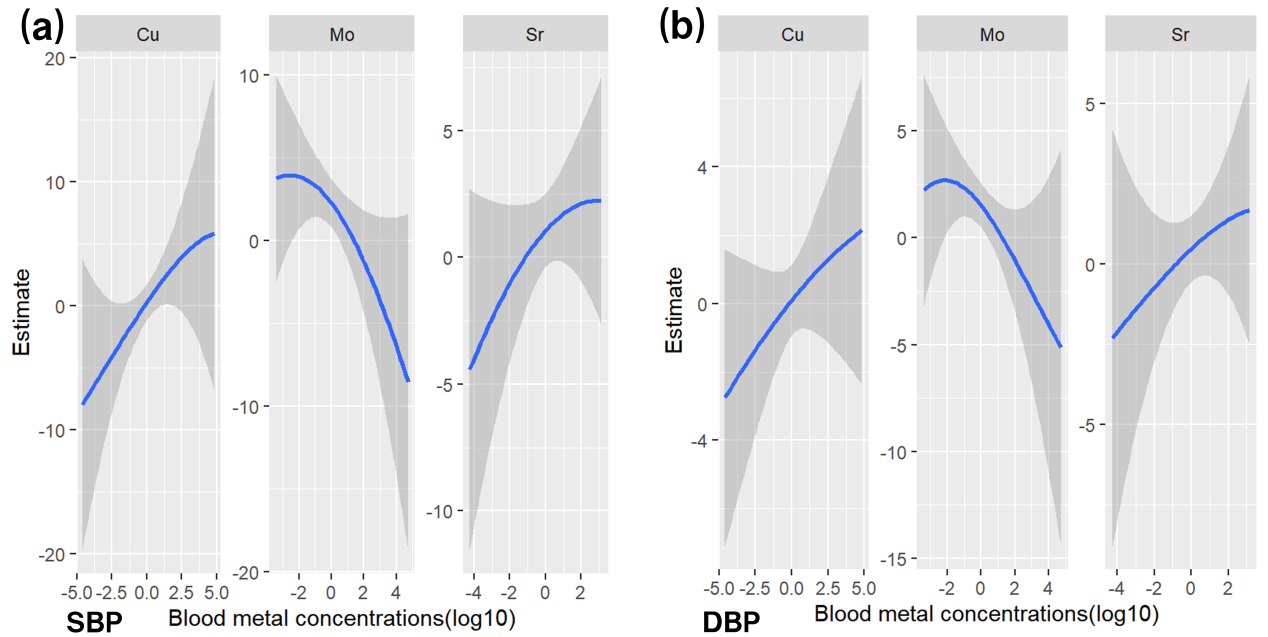 |
| --- |

**Figure. S3.** Univariate exposure–response functions for Cu, Mo and Sr in relation to blood pressure.The other elements held at median concentrations. (a) SBP, Systolic Blood Pressure；(b) DBP, Diastolic Blood Pressure.

| 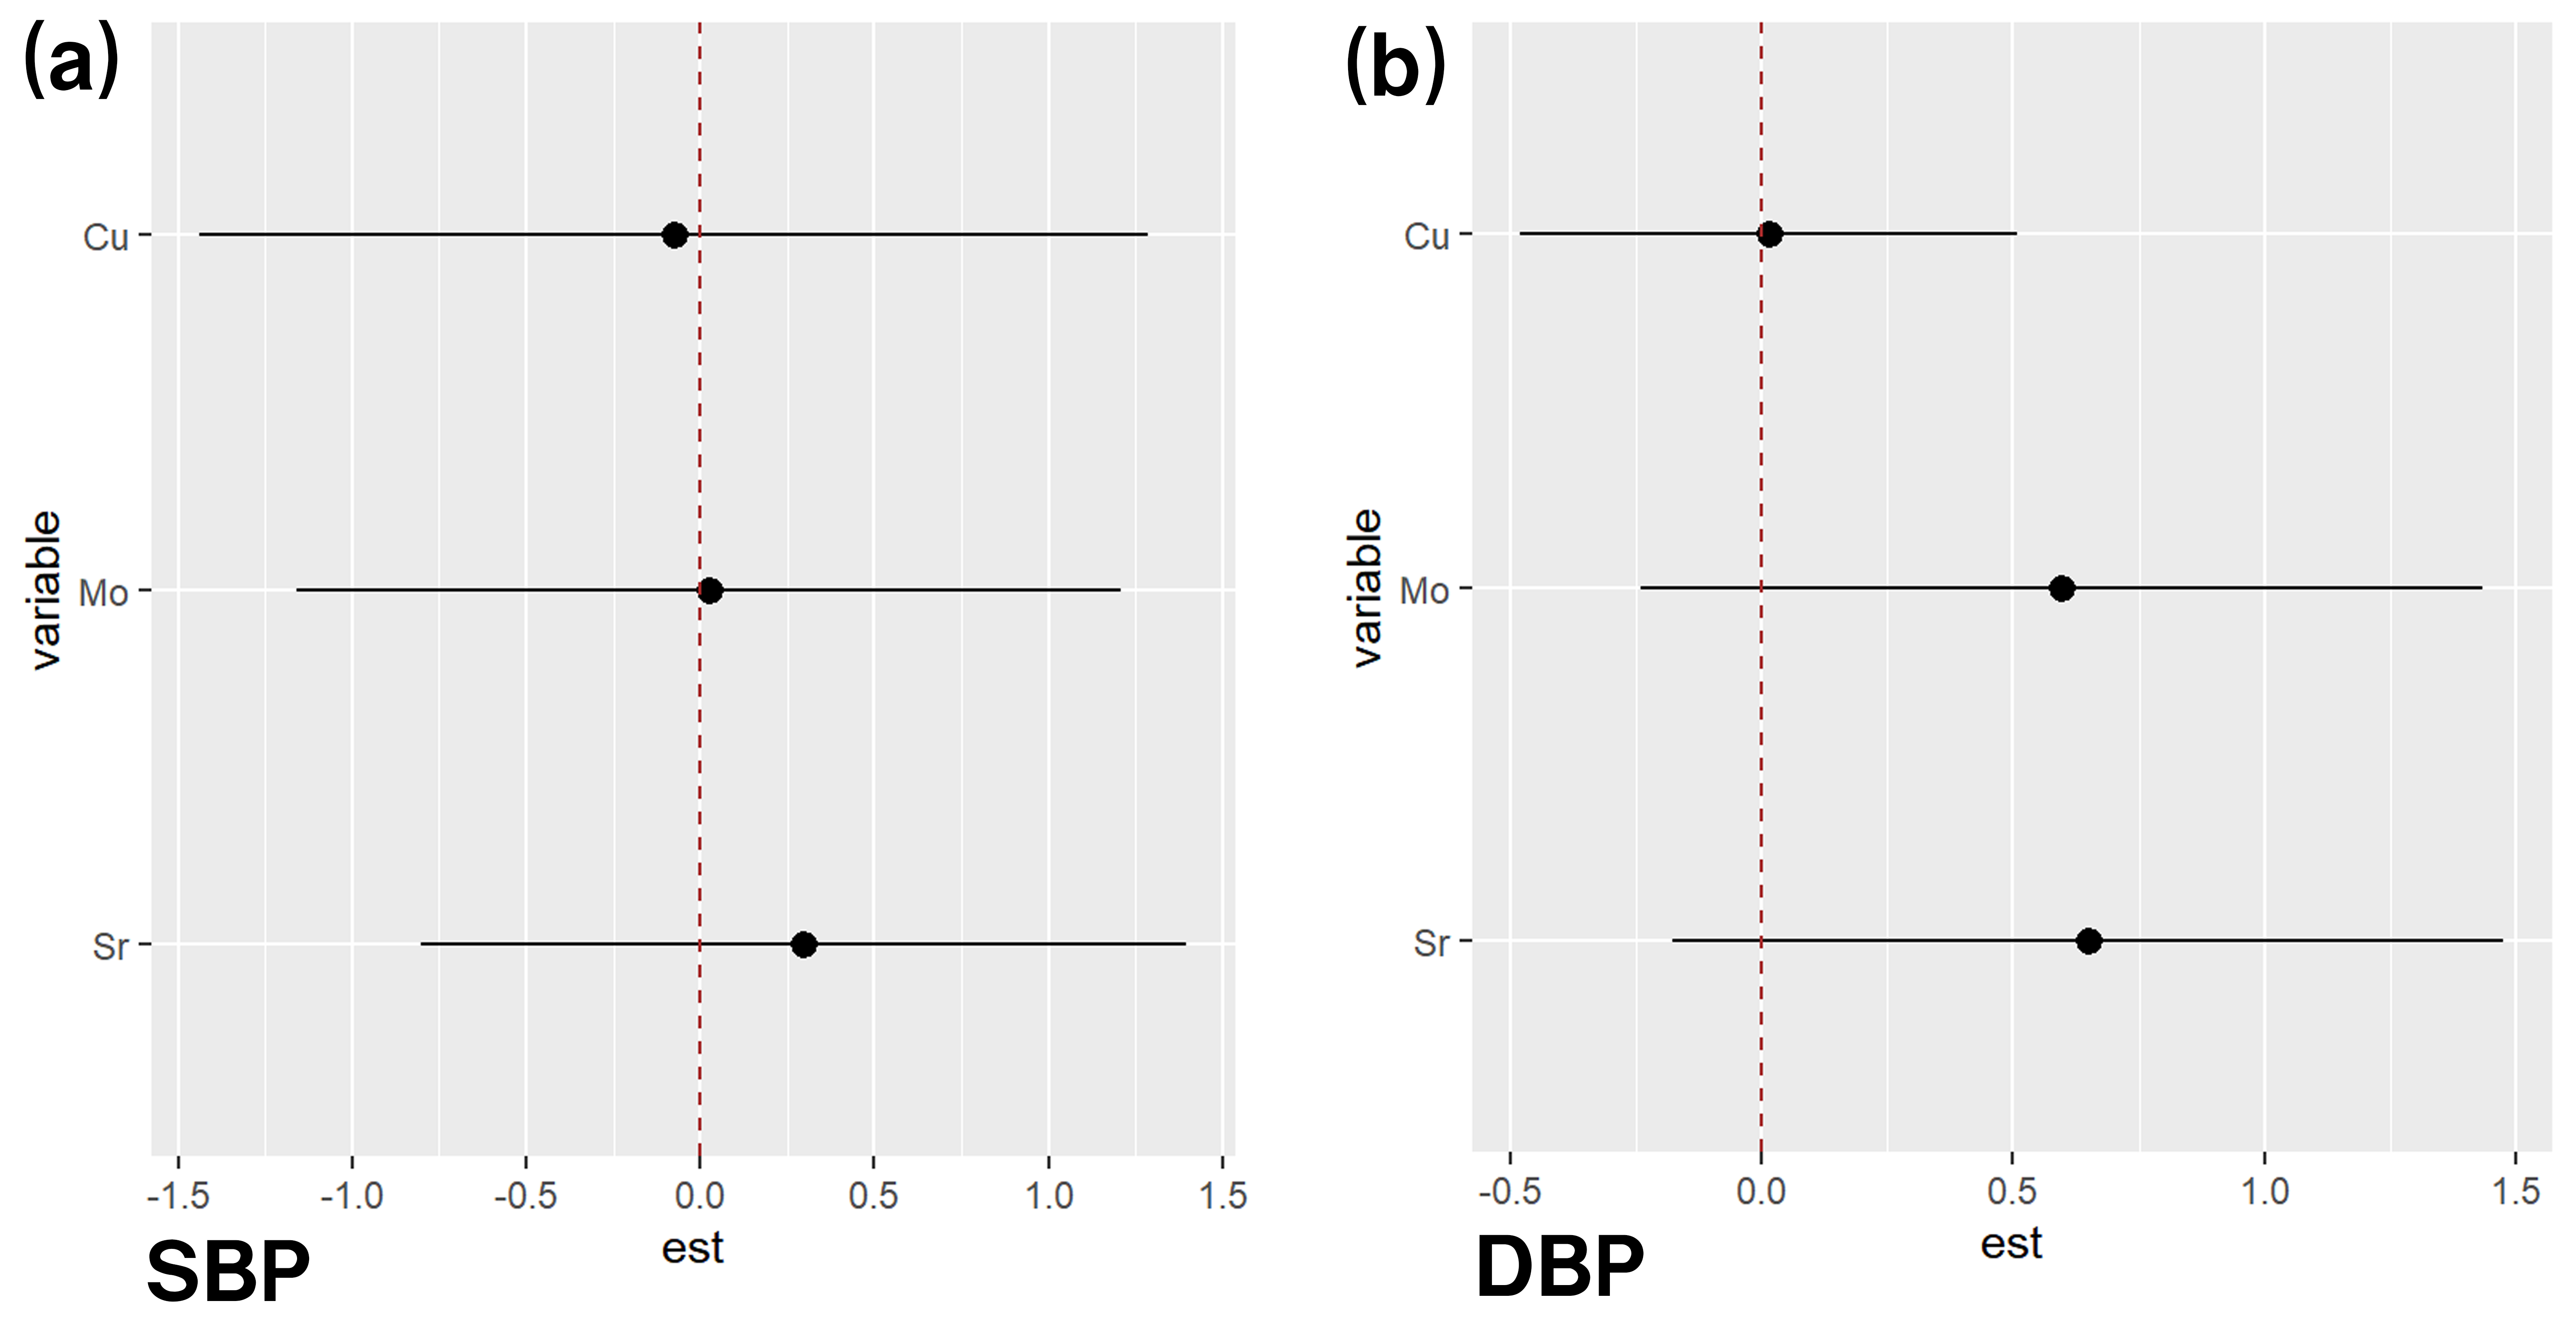 |
| --- |

### **Figure. S4**. Interactions between single metals and mixed metal exposures. (a) SBP, Systolic Blood Pressure；(b) DBP, Diastolic Blood Pressure

| 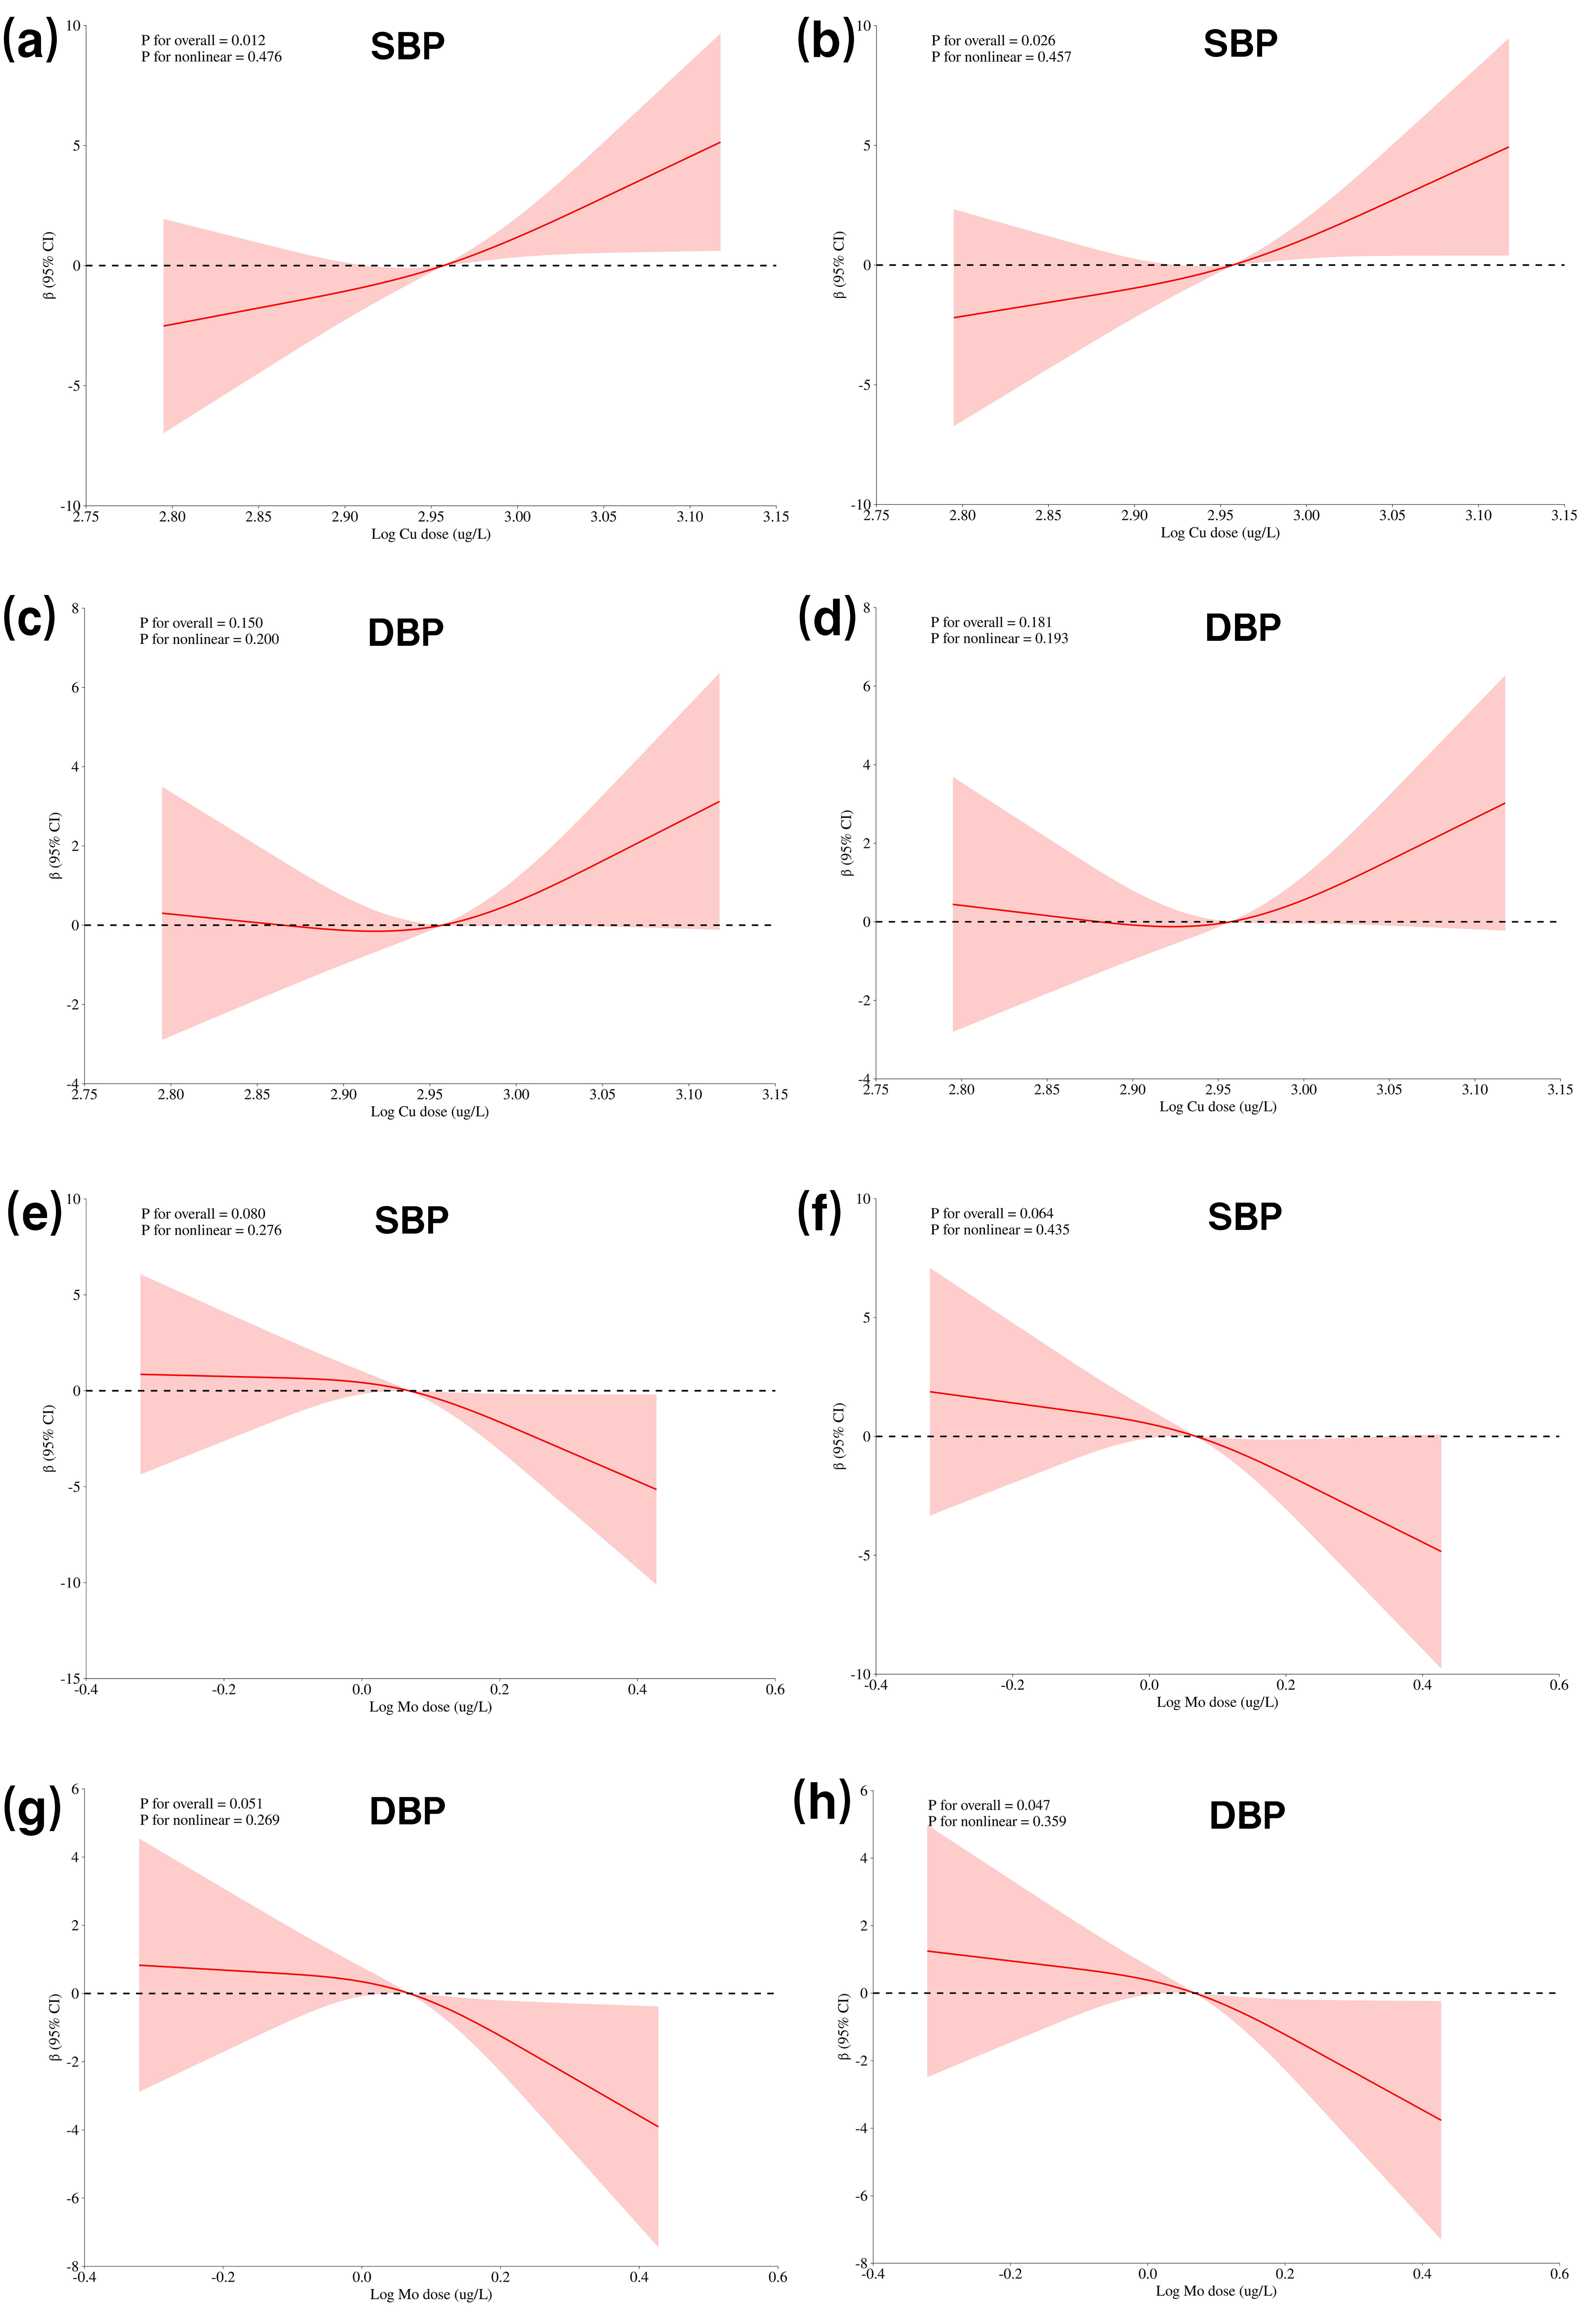 |
| --- |

### **Figure. S5**. RCS dose–response relationships between Cu and Mo exposure levels and SBP/DBP. All metal concentrations were log₁₀-transformed. **(a)** Cu and SBP, model adjusted for all covariates; **(b)** Cu and SBP, model adjusted for all covariates plus Mo and Sr; **(c)** Cu and DBP, model adjusted for all covariates; **(d)** Cu and DBP, model adjusted for all covariates plus Mo and Sr; **(e)** Mo and SBP, model adjusted for all covariates; **(f)** Mo and SBP, model adjusted for all covariates plus Cu and Sr; **(g)** Mo and DBP, model adjusted for all covariates; **(h)** Mo and DBP, model adjusted for all covariates plus Cu and Sr. SBP: Systolic Blood Pressure；DBP: Diastolic Blood Pressure.
